# Supplementary material for: Large-Scale Mapping of Complex Forest Typologies Using Multispectral Imagery and Low-Density Airborne LiDAR: A Case Study in Pinsapo Fir Forests
Source: MDPI journal article supplement (doi:10.3390/rs16173182), 2024-08-28
Supplement: s1 [file s1]

**Supplementary Information for**

**Large-scale Mapping of complex Forest Typologies Using Multispectral Imagery and Low-Density Airborne LiDAR: A Case Study in Pinsapo Fir Forests**

Antonio Jesús Ariza-Salamanca, Pablo González-Moreno, José Benedicto López-Quintanilla, Rafael M<sup>a</sup> Navarro-Cerrillo

Correspondence to:

**Rafael M<sup>a</sup> Navarro-Cerrillo**

**Email: [rmnavarro@uco.es](mailto:rmnavarro@uco.es)**

**This PDF file includes:**

**Description of LiDAR metrics**

**Tables S1 to S3**

## Description of LiDAR metrics

### 1. Height Metrics:

- Maximum Height
- Minimum Height
- Mean Height
- Median Height
- Height Percentiles (e.g., 25th, 50th, 75th, 90th, 95th, 99th percentiles)

### 2. Canopy Metrics:

- Canopy Cover: The percentage of ground covered by vegetation.
- Canopy Relief Ratio (CRR): The ratio of the mean canopy height to the maximum canopy height.

### 3. Statistical Metrics:

- Standard Deviation: A measure of the amount of variation or dispersion of height values.
- Variance: The square of the standard deviation.
- Skewness: The measure of asymmetry of the height distribution.
- Kurtosis: The measure of the "tailedness" of the height distribution.

## TABLES

**Table S1.** Number of plots of each silvicultural type found in the sampled plots (n = 694).

| Type* | I0 | I1 | I2 | II0a | II0b | II0c | II1a | II1b | II1c | III0 | III1 |
|-------|----|----|----|------|------|------|------|------|------|------|------|
| SN    | -  | -  | -  | 16   | 20   | 91   | 31   | 12   | 130  | -    | 4    |
| SG    | -  | -  | -  | -    | 6    | 142  | 2    | 12   | 220  | -    | 8    |

\*see Table 1 (main manuscript) for typology types description

**Table S2.** Main structural characteristics of the seven types of pinsapo fir forests found in the sampled plots.

|      | SN            |              |                 | SG            |              |                 |
|------|---------------|--------------|-----------------|---------------|--------------|-----------------|
|      | dbh (± sd)    | ba (± sd)    | N (± sd)        | dbh (± sd)    | ba (± sd)    | N (± sd)        |
| II0a | 58.41(±19.55) | 16.51(±5.16) | 45.08(±8.45)    | -             | -            | -               |
| II0b | 18.64(±10.43) | 16.22(±2.14) | 867.35(±110.68) | 27.44(±19.17) | 31.14(±5.14) | 878.96(±155.84) |
| II0c | 24.44(±15.45) | 20.19(±2.14) | 691.81(±91.59)  | 37.62(±22.01) | 52.78(±4.50) | 631.76(±53.18)  |
| II1a | 10.24(±7.07)  | 2.72(±0.57)  | 552.29(±190.54) | 24.47(±19.59) | 5.59(±1.31)  | 329.61(±157.68) |
| II1b | 17.28(±11.91) | 17.34(±1.74) | 800.48(±62.78)  | 27.59(±17.88) | 20.03(±2.49) | 591.73(±78.50)  |
| II1c | 20.89(±14.79) | 16.55(±1.70) | 602.88(±68.12)  | 32.83(±23.12) | 34.95(±3.91) | 577.68(±75.46)  |
| III1 | 25.47(±15.12) | 13.87(±1.47) | 705.12(±81.65)  | 18.64(±10.85) | 16.57(±2.40) | 541.88(±45.12)  |

**Table S3.** Importance values (%) of trees (dbh > 5 cm) found in sampled plots (n = 694) at pinsapo fir forests in SN and SG.

| Spp.                                                       | SN     | SG   |
|------------------------------------------------------------|--------|------|
| <i>Rhamnus frangula</i> L.                                 | < 0.01 | -    |
| <i>Phillyrea latifolia</i> L.                              | < 0.01 | -    |
| <i>Cedrus atlantica</i> (Endl.) Manetti ex Carriere        | 0.06   | -    |
| <i>Pinus sylvestris</i> L.                                 | 0.82   | -    |
| <i>Pinus halepensis</i> Mill.                              | 10.4   | -    |
| <i>Pinus pinaster</i> Aiton                                | 2.32   | -    |
| <i>Abies pinsapo</i> Boiss.                                | 66.6   | 62.9 |
| <i>Cupressus sempervirens</i> L.                           | 0.02   | -    |
| <i>Juniperus communis</i> L.                               | 9.50   | -    |
| <i>Juniperus phoenicea</i> L.                              | 9.36   | -    |
| <i>Quercus faginea</i> Lam.                                | 0.11   | 5.25 |
| <i>Quercus ilex</i> L. subsp. <i>ballota</i> (Desf.) Samp. | 0.73   | 31.9 |

|                                                         |        |      |
|---------------------------------------------------------|--------|------|
| <i>Olea europaea</i> var. <i>syvestris</i> (Mill.) Lehr | < 0.01 | 0.02 |
| <i>Ceratonia siliqua</i> L.                             | < 0.01 | -    |
| <i>Castanea sativa</i> Mill.                            | 0.02   | -    |
| <i>Acer campestre</i> L.                                | 0.02   | -    |
| <i>Robinia pseudoacacia</i> L.                          | < 0.01 | -    |
